# Supplementary material
Source: MDPI journal article supplement (https://www.mdpi.com/1424-2818/14/9/714)
Supplement: s1 [file s1]

Archive with 2 entries (2 files):
- Figure S1-S6.pdf
- Table S1-S6.xlsx
