# Supplementary material
Source: MDPI journal article supplement (https://www.mdpi.com/1424-2818/14/9/714)
Supplement: s1 [file s1 › Table S1-S6.xlsx]

## Sheet: Table S1
Table S1. The information of specimens in the study.
ID	Species	Collected_by	Collection_date	Location	Identified_by
420Ra	Aporrectodea tuberculata	Yufeng Zhang	2021-Jul-15	China:Heilongjiang:Anda	Yufeng Zhang
420Rb	Aporrectodea tuberculata	Yufeng Zhang	2021-Jul-15	China:Heilongjiang:Anda	Yufeng Zhang
420Rc	Aporrectodea tuberculata	Yufeng Zhang	2021-Jul-15	China:Heilongjiang:Anda	Yufeng Zhang
420Rd	Aporrectodea tuberculata	Yufeng Zhang	2021-Jul-15	China:Heilongjiang:Anda	Yufeng Zhang
420Re	Aporrectodea tuberculata	Yufeng Zhang	2021-Jul-15	China:Heilongjiang:Anda	Yufeng Zhang
420Rf	Aporrectodea tuberculata	Yufeng Zhang	2021-Jul-15	China:Heilongjiang:Anda	Yufeng Zhang
DL377	Aporrectodea trapezoides	Lichao Feng	2021-Aug-08	China:Jilin:Jilin	Yufeng Zhang
374NHa	Eisenia nordenskioldi	Yufeng Zhang	2021-Aug-08	China:Jilin:Changchun:Nanhu Park	Yufeng Zhang
374NHb	Eisenia nordenskioldi	Yufeng Zhang	2021-Aug-08	China:Jilin:Changchun:Nanhu Park	Yufeng Zhang
451Ra	Eisenia nordenskioldi	Yufeng Zhang	2021-Aug-05	China:Heilongjiang:Beian	Yufeng Zhang
451Rb	Eisenia nordenskioldi	Yufeng Zhang	2021-Aug-05	China:Heilongjiang:Beian	Yufeng Zhang
456Ra	Eisenia nordenskioldi	Yufeng Zhang	2021-Aug-04	China:Heilongjiang:Wudalianchi	Yufeng Zhang
456Rb	Eisenia nordenskioldi	Yufeng Zhang	2021-Aug-04	China:Heilongjiang:Wudalianchi	Yufeng Zhang
374JYa	Drawida ghilarovi	Yufeng Zhang	2021-Aug-08	China:Jilin:Changchun:Jingyuetan Park	Yufeng Zhang
374JYb	Drawida ghilarovi	Yufeng Zhang	2021-Aug-08	China:Jilin:Changchun:Jingyuetan Park	Yufeng Zhang

## Sheet: Table S2
Table S2. The best substitute models were selected by jModeltest 2.1.7 for the genes in PCGrRNA and PCG datasets.
Markers	Best AIC model
01ATP6	GTR+I+G
02ATP8	TVM+I+G
03COX1	GTR+I+G
04COX2	GTR+I+G
05COX3	TPM2uf+I+G
06CYTB	GTR+I+G
07ND1	TVM+I+G
08ND2	GTR+I+G
09ND3	GTR+I+G
10ND4	TVM+I+G
11ND4L	TIM2+I+G
12ND5	GTR+I+G
13ND6	TIM2+I+G
lrRNA	TIM2+I+G
srRNA	TIM2+I+G

## Sheet: Table S3
Table S3. Organization of the mitogenomes of the lumbricid species A. tuberculata (OL840316), A. trapezoides (OM687887) and E. nordenskioldi (OL840314). All features are located in majority strand.
Feature	Position(from)	Position(to)	Length	Intergenic nucleotides	Anticodon	Initial codon	Stop codon
COX1	1/1/1	1532/1532/1532	1532/1532/1532	8/8/8		ATG	TA-
trnN	1541/1541/1541	1601/1601/1600	61/61/60	1/1/1	GTT
COX2	1603/1603/1602	2289/2289/2288	687/687/687	-1/-1/-2		ATG	TAG
trnD	2289/2289/2288	2349/2349/2348	61/61/61	0/0/0	GTC
ATP8	2350/2350/2349	2509/2509/2508	160/160/160	0/0/0		ATG	T--
trnY	2510/2510/2509	2572/2571/2568	63/62/60	-2/-2/0	GTA
trnG	2571/2570/2569	2633/2632/2630	63/63/62	1/1/1	TCC
COX3	2635/2634/2632	3412/3411/3409	778/778/778	1/1/1		ATG	T--
trnQ	3414/3413/3411	3482/3481/3479	69/69/69	0/0/0	TTG
ND6	3483/3482/3480	3950/3949/3945	468/468/466	1/1/0		ATG	TAA/TAA/T--
CYTB	3952/3951/3946	5091/5090/5085	1140/1140/1140	-2/-2/-2		ATG	TAA
trnW	5090/5090/5084	5153/5150/5145	64/62/62	2/2/2	TCA
ATP6	5156/5153 /5148	5851/5848 /5843	696/696/696	6/1/-2		ATG	TAA
trnR	5858/5850/5842	5920/5914/5901	63/ 65 /60	0/0/0	TCG
CR	5921/5915/5902	6327/6354/6658	407/440/757	0/0/0
trnH	6328/6355/6659	6389/6416/6720	62/62/62	0/0/0	GTG
ND5	6390/6417/6721	8111/8138/8442	1722/1722/1722	122/0/0		ATG	TAA
trnF	8234/8139/8443	8294/8199/8502	61/61/60	1/0/3	GAA
trnE	8296/8200/8506	8358/8262/8568	63/63/63	-2/-2/-2	TTC
trnP	8357/8261/8567	8420/8324/8629	64/64/63	0/0/1	TGG
trnT	8421/8325/8631	8483/8387/8694	63/63/64	0/0/0	TGT
ND4L	8484/8388/8695	8775/8684/8986	282/297/282	-2/2/-2		ATG	T--
ND4	8774/8687/8985	10,132/10,024/10,343	1359/1338/1359	-2/10/-2		ATG	TAG
trnC	10,131/10,035/10,342	10,195/10,099/10,406	65/65/65	1/1/1	GCA
trnM	10,197/10,101/10,408	10,259/10,163/10,470	63/63/63	-2/-2/-2	CAT
rrnS	10,258/10162/10,469	11,045/10950/11,252	788/789/784	0/0/0
trnV	11,046/10951/11,253	11,108/11013/11,314	63/63/62	-2/0/-2	TAC
rrnL	11,107/11014/11,313	12,362/12269/12,562	1256/1256/1250	-3/-3/0
trnL1	12,360/12267/12,563	12,421/12328/12,622	62/62/60	4/7/1	TAG
trnA	12,426/12336/12,624	12,487/12397/12,687	62/62/64	-2/-2/-2	TGC
trnS2	12,486/12396/12,686	12,552/12462/12,752	67/67/67	0/0/0	TGA
trnL2	12,553/12463/12,753	12,614/12524/12,814	62/62/62	1/1/0	TAA
ND1	12,616/12526/12,815	13,537/13447/13,736	922/922/922	0/0/-2		ATG	T--
trnI	13,538/13448/13,737	13,603/13511/13,801	66/64/65	0/0/2	GAT
trnK	13,604/13512/13,804	13,666/13575/13,867	63/64/64	0/0/0	TTT
ND3	13,667/13576/13,868	14,020/13929/14,221	354/354/354	-2/-2/0		ATG	TAG
trnS1	14,019/13928/14,220	14,082/13991/14,283	64/64/64	1/1/1	TCT
ND2	14,084/13993/14,285	15,089/14998/15,290	1006/1006/1009			ATG	T--

## Sheet: Table S4
Table S4. Organization of the mitogenomes of Drawida ghilarovi (OL840312). All features are located in majority strand.
Feature	Position(from)	Position(to)	Length	Intergenic nucleotides	Anticodon	Initial codon	Stop codon
COX1	1	1532	1532	8		ATG	TA
trnN	1541	1601	61	1	GTT
COX2	1603	2289	687	-2		ATG	TAA
trnD	2288	2349	62	0	GTC
ATP8	2350	2509	160	1		ATG	T--
trnY	2511	2574	64	-2	GTA
trnG	2573	2635	63	3	TCC
COX3	2636	3413	778	0		ATG	T--
trnQ	3414	3482	69	0	TTG
ND6	3483	3950	468	1		ATG	TAA
CYTB	3952	5097	1146	-2		ATG	TAA
trnW	5096	5156	61	1	TCA
ATP6	5158	5853	696	4		ATG	TAA
trnR	5858	5923	66	0	TCG
CR	5924	6410	487	0
trnH	6411	6473	63	0	GTG
ND5	6474	8195	1722	-1		ATG	TAG
trnF	8195	8256	62	2	GAA
trnE	8259	8323	65	4	TTC
trnP	8328	8389	62	5	TGG
trnT	8395	8457	63	0	TGT
ND4L	8458	8749	282	-2		ATG	T--
ND4	8748	10107	1360	0		ATG	T--
trnC	10108	10171	64	2	GCA
trnM	10174	10236	63	0	CAT
rrnS	10237	11037	801	0
trnV	11038	11104	67	0	TAC
rrnL	11105	12340	1236	0
trnL1	12341	12402	62	1	TAG
trnA	12404	12468	65	0	TGC
trnS2	12469	12534	66	0	TGA
trnL2	12535	12595	61	0	TAA
ND1	12596	13525	930	-2		ATG	TAG
trnI	13524	13587	64	1	GAT
trnK	13589	13652	64	0	TTT
ND3	13653	14006	354	0		ATG	TAA
trnS1	14007	14072	66	-1	TCT
ND2	14072	15080	1009			ATG	T--

## Sheet: Table S5
Table S5. The nucleotide sites of the variants and indels of earthworms in this study
The nucleotide sites of variants and indels of six mitogenomes of A. tuberculata. Site location is counted based on alignments.							The nucleotide sites of variants and indels of two mitogenomes of the same population of E. nordenskioldi of Changchun (Nanhu Park) Site location is counted based on alignments.							The nucleotide site of variants and indels of two mitogenomes of D. ghilarovii of Changchun (Jingyuetan National Scenic Area) Site location is counted based on alignments.
no.	variant located in gene	site (bp)	no.	indels located in gene	site (bp)		no.	variant located in gene	site (bp)	no.	indels located in gene	site (bp)		no.	variant located in gene	site (bp)		indels located in gene	site (bp)
1	COX1	78	1	trnW	5103		1	COX1	328	1	CR	5940-5943		1	none	none		CR	6016-6034
2	COX1	153	2	trnR	5918		2	COX3	3313	2	rrnL	12543
3	COX1	306	3	CR	5939		3	ND5	8260
4	COX1	375	4	CR	5942		4	ND4	9245
5	COX1	450	5	CR	6107		5	ND2	14467
6	COX1	516	6	trnT	8533
7	COX1	549	7	rrnL	11548			The nucleotide sites of variants and indels of four mitogenomes of E. nordenskioldi of Bei’an-Wudalianchi lineages Site location is counted based on alignments.
8	COX1	669	8	rrnL	11700		no.	variant located in gene	site (bp)	no.	indels located in gene	site (bp)
9	COX1	681					1	COX1	393	1	trnR	5906
10	COX1	708					2	COX1	951	2	CR	5961-5968
11	COX1	732					3	ATP8	2457	3	CR	5971
12	COX1	744					4	CYTB	4674	4
13	COX1	783					5	CR	5918	5
14	COX1	789					6	CR	7199	6
15	COX1	843					7	rrnL	12915	7
16	COX1	885
17	COX1	903
18	COX1	951
19	COX1	975
20	COX1	1128
21	COX1	1158
22	COX1	1182
23	COX1	1206
24	COX1	1215
25	COX1	1266
26	COX1	1296
27	COX1	1359
28	COX1	1425
29	intron	1533
30	COX2	1701
31	COX2	1704
32	COX2	1719
33	COX2	1794
34	COX2	1839
35	COX2	1857
36	COX2	1866
37	COX2	1902
38	COX2	1905
39	COX2	1950
40	COX2	1952
41	COX2	1974
42	COX2	1989
43	COX2	1992
44	COX2	2016
45	COX2	2127
46	COX2	2187
47	COX2	2226
48	COX2	2332
49	COX2	2436
50	ATP8	2451
51	ATP8	2474
52	ATP8	2476
53	ATP8	2479
54	ATP8	2480
55	ATP8	2502
56	COX3	2670
57	COX3	2679
58	COX3	2694
59	COX3	2718
60	COX3	2730
61	COX3	2883
62	COX3	3015
63	COX3	3097
64	COX3	3144
65	COX3	3156
66	COX3	3165
67	COX3	3225
68	COX3	3228
69	COX3	3303
70	COX3	3318
71	COX3	3342
72	COX3	3345
73	COX3	3351
74	COX3	3354
75	COX3	3372
76	COX3	3384
77	ND6	3500
78	ND6	3536
79	ND6	3582
80	ND6	3617
81	ND6	3626
82	ND6	3665
83	ND6	3692
84	ND6	3734
85	ND6	3740
86	ND6	3778
87	ND6	3779
88	ND6	3783
89	ND6	3784
90	ND6	3830
91	ND6	3854
92	ND6	3873
93	CYTB	4050
94	CYTB	4063
95	CYTB	4083
96	CYTB	4098
97	CYTB	4128
98	CYTB	4153
99	CYTB	4188
100	CYTB	4269
101	CYTB	4272
102	CYTB	4275
103	CYTB	4308
104	CYTB	4350
105	CYTB	4395
106	CYTB	4432
107	CYTB	4440
108	CYTB	4446
109	CYTB	4476
110	CYTB	4584
111	CYTB	4629
112	CYTB	4640
113	CYTB	4654
114	CYTB	4675
115	CYTB	4713
116	CYTB	4767
117	CYTB	4779
118	CYTB	4818
119	CYTB	4824
120	CYTB	4897
121	CYTB	4917
122	CYTB	4933
123	CYTB	4935
124	CYTB	5007
125	CYTB	5028
126	CYTB	5048
127	CYTB	5052
128	CYTB	5058
129	trnW	5070
130	ATP6	5136
131	ATP6	5174
132	ATP6	5222
133	ATP6	5223
134	ATP6	5252
135	ATP6	5270
136	ATP6	5276
137	ATP6	5288
138	ATP6	5294
139	ATP6	5337
140	ATP6	5366
141	ATP6	5408
142	ATP6	5426
143	ATP6	5468
144	ATP6	5502
145	ATP6	5523
146	ATP6	5525
147	ATP6	5546
148	ATP6	5558
149	ATP6	5582
150	ATP6	5585
151	ATP6	5666
152	ATP6	5693
153	ATP6	5744
154	ATP6	5762
155	ATP6	5768
156	ATP6	5792
157	ATP6	5795
158	CR	5915
159	CR	5930
160	CR	5932
161	CR	5937
162	CR	5939
163	CR	5940
164	CR	5941
165	CR	5943
166	CR	5945
167	CR	5946
168	CR	5948
169	CR	5950
170	CR	5951
171	CR	5953
172	CR	5956
173	CR	5957
174	CR	5959
175	CR	5960
176	CR	5961
177	CR	5962
178	CR	5963
179	CR	5969
180	CR	5971
181	CR	5975
182	CR	5977
183	CR	5988
184	CR	5991
185	CR	5992
186	CR	5993
187	CR	5994
188	CR	5996
189	CR	6006
190	CR	6007
191	CR	6016
192	CR	6017
193	CR	6018
194	CR	6019
195	CR	6025
196	CR	6035
197	CR	6043
198	CR	6093
199	CR	6098
200	CR	6099
201	CR	6121
202	CR	6122
203	CR	6123
204	CR	6124
205	CR	6126
206	CR	6133
207	CR	6162
208	CR	6167
209	CR	6177
210	CR	6180
211	CR	6209
212	CR	6227
213	CR	6231
214	CR	6294
215	CR	6295
216	CR	6296
217	CR	6297
218	CR	6308
219	CR	6309
220	CR	6311
221	CR	6322
222	ND5	6480
223	ND5	6494
224	ND5	6607
225	ND5	6633
226	ND5	6642
227	ND5	6687
228	ND5	6730
229	ND5	6759
230	ND5	6783
231	ND5	6792
232	ND5	6798
233	ND5	6816
234	ND5	6882
235	ND5	6957
236	ND5	7038
237	ND5	7083
238	ND5	7146
239	ND5	7155
240	ND5	7182
241	ND5	7191
242	ND5	7191
243	ND5	7413
244	ND5	7428
245	ND5	7485
246	ND5	7503
247	ND5	7509
248	ND5	7556
249	ND5	7557
250	ND5	7560
251	ND5	7638
252	ND5	7671
253	ND5	7752
254	ND5	7782
255	ND5	7786
256	ND5	7806
257	ND5	7818
258	ND5	7848
259	ND5	7852
260	ND5	7890
261	ND5	8039
262	ND5	8046
263	ND5	8056
264	ND5	8066
265	ND5	8119
266	ND5	8133
267	intron	8154
268	intron	8163
269	intron	8166
270	intron	8174
271	intron	8184
272	intron	8199
273	intron	8200
274	intron	8201
275	intron	8203
276	intron	8207
277	intron	8228
278	intron	8251
279	intron	8256
280	intron	8258
281	trnP	8415
282	trnP	8448
283	ND4L	8510
284	ND4L	8532
285	ND4L	8608
286	ND4L	8650
287	ND4L	8666
288	ND4L	8719
289	ND4L	8744
290	ND4	8862
291	ND4	8934
292	ND4	8958
293	ND4	8969
294	ND4	9001
295	ND4	9055
296	ND4	9075
297	ND4	9115
298	ND4	9117
299	ND4	9255
300	ND4	9282
301	ND4	9289
302	ND4	9325
303	ND4	9343
304	ND4	9405
305	ND4	9408
306	ND4	9417
307	ND4	9438
308	ND4	9462
309	ND4	9468
310	ND4	9510
311	ND4	9529
312	ND4	9537
313	ND4	9561
314	ND4	9577
315	ND4	9609
316	ND4	9675
317	ND4	9786
318	ND4	9804
319	ND4	9813
320	ND4	9840
321	ND4	9858
322	ND4	9873
323	ND4	9930
324	ND4	10021
325	ND4	10137
326	ND4	10144
327	ND4	10149
328	ND4	10170
329	ND4	10172
330	rrnS	10378
331	rrnS	10393
332	rrnS	10396
333	rrnS	10445
334	rrnS	10540
335	rrnS	10555
336	rrnS	10572
337	rrnS	10574
338	rrnS	10672
339	rrnS	10775
340	rrnS	10867
341	rrnS	10953
342	rrnS	10979
343	rrnS	10987
344	trnV	11095
345	rrnL	11210
346	rrnL	11221
347	rrnL	11222
348	rrnL	11253
349	rrnL	11317
350	rrnL	11394
351	rrnL	11523
352	rrnL	11525
353	rrnL	11526
354	rrnL	11528
355	rrnL	11530
356	rrnL	11560
357	rrnL	11598
358	rrnL	11607
359	rrnL	11624
360	rrnL	11670
361	rrnL	11679
362	rrnL	11702
363	rrnL	11717
364	rrnL	11753
365	rrnL	11779
366	rrnL	11785
367	rrnL	11923
368	rrnL	11927
369	rrnL	11939
370	rrnL	12053
371	trnS	12523
372	trnL	12601
373	ND1	12714
374	ND1	12717
375	ND1	12759
376	ND1	12801
377	ND1	12810
378	ND1	12861
379	ND1	12867
380	ND1	12894
381	ND1	12900
382	ND1	12918
383	ND1	12932
384	ND1	12996
385	ND1	13035
386	ND1	13149
387	ND1	13164
388	ND1	13188
389	ND1	13206
390	ND1	13266
391	ND1	13338
392	ND1	13339
393	ND1	13380
394	ND1	13407
395	ND1	13420
396	ND1	13433
397	ND1	13464
398	ND1	13518
399	ND1	13533
400	ND1	13536
401	ND1	13543
402	ND1	13577
403	ND3	13744
404	ND3	13840
405	ND3	13846
406	ND3	13912
407	ND3	13933
408	ND3	13939
409	ND3	13977
410	ND4	14003
411	trnS	14065
412	ND2	14136
413	ND2	14176
414	ND2	14182
415	ND2	14185
416	ND2	14192
417	ND2	14201
418	ND2	14233
419	ND2	14272
420	ND2	14273
421	ND2	14287
422	ND2	14335
423	ND2	14401
424	ND2	14407
425	ND2	14422
426	ND2	14467
427	ND2	14521
428	ND2	14563
429	ND2	14577
430	ND2	14589
431	ND2	14637
432	ND2	14645
433	ND2	14683
434	ND2	14746
435	ND2	14749
436	ND2	14782
437	ND2	14837
438	ND2	14854
439	ND2	14887
440	ND2	14908
441	ND2	14953
442	ND2	14977
443	ND2	14980
444	ND2	14989
445	ND2	15004
446	ND2	15059
447	ND2	15077

## Sheet: Table S6
Table S6. Statistics of mitogenomes of A. tuberculata (420Ra-f), A.trapezoides (DL377), E. nordenskioldi (374NHa-b, 451Ra-b, 456Ra-b) and D. ghilarovi (374JYa-b) .
	whole seq	CDS	tRNAs	rRNAs	CR
420Ra (OL840316) length (bp)	15089	11116	1394	2044	404
ratioAT	0.621115	0.61416	0.651363	0.633562	0.64604
ratioGC	0.378885	0.38584	0.348637	0.366438	0.351485
ATskew	0.0177123	-0.0247547	0.0638767	0.201544	0.0344828
GCskew	-0.211824	-0.25717	-0.00411523	-0.110814	-0.0422535
420Rb (OL840317) length (bp)	15058	11116	1396	2044	374
ratioAT	0.6208	0.61353	0.649713	0.636008	0.647059
ratioGC	0.3792	0.38647	0.350287	0.363992	0.352941
ATskew	0.0162602	-0.0255132	0.0628445	0.196923	0.0413223
GCskew	-0.210508	-0.257449	0.00204499	-0.102151	-0.030303
420Rc (OM687883) length (bp)	15125	11116	1394	2043	444
ratioAT	0.622413	0.61407	0.650646	0.634361	0.693694
ratioGC	0.377587	0.38593	0.349354	0.365639	0.306306
ATskew	0.0201827	-0.0254908	0.0672547	0.203704	0.116883
GCskew	-0.21695	-0.261072	-0.0102669	-0.108434	-0.102941
420Rd (OM687884) length (bp)	15126	11116	1394	2047	441
ratioAT	0.622637	0.61398	0.649928	0.635076	0.70068
ratioGC	0.377363	0.38602	0.350072	0.364924	0.29932
ATskew	0.0184753	-0.025641	0.0684327	0.204615	0.0614887
GCskew	-0.217239	-0.259846	-0.0122951	-0.108434	-0.151515
420Re (OM687885) length (bp)	15129	11116	1394	2047	444
ratioAT	0.622711	0.61398	0.649928	0.635076	0.702703
ratioGC	0.377289	0.38602	0.350072	0.364924	0.297297
ATskew	0.0175141	-0.025641	0.0684327	0.204615	0.0320513
GCskew	-0.217239	-0.259846	-0.0122951	-0.108434	-0.151515
420Rf (OM687886) length (bp)	15116	11116	1394	2043	444
ratioAT	0.622188	0.61407	0.650646	0.634361	0.686937
ratioGC	0.377812	0.38593	0.349354	0.365639	0.313063
ATskew	0.0203083	-0.0254908	0.0672547	0.203704	0.134426
GCskew	-0.21695	-0.261072	-0.0102669	-0.108434	-0.0791367
DL377 (OM687882) length (bp)	14998	11100	1392	2045	440
ratioAT	0.644953	0.637658	0.660201	0.656235	0.731818
ratioGC	0.355047	0.362342	0.339799	0.343765	0.268182
ATskew	0.00341156	-0.0381464	0.0533188	0.184799	0.0310559
GCskew	-0.191362	-0.235704	0.0190275	-0.100996	0
374NHa (OL840314) length (bp)	15290	11114	1382	2034	757
ratioAT	0.610268	0.602123	0.633864	0.624385	0.655218
ratioGC	0.389732	0.397877	0.366136	0.375615	0.344782
ATskew	-0.0468331	-0.09474	0.0251142	0.12126	0.0564516
GCskew	-0.201208	-0.247852	-0.027668	-0.112565	0.0574713
374NHb (OL840315) length (bp)	15296	11114	1382	2036	761
ratioAT	0.610552	0.602123	0.633864	0.624754	0.65703
ratioGC	0.389448	0.397877	0.366136	0.375246	0.34297
ATskew	-0.0470072	-0.09474	0.0251142	0.119497	0.056
GCskew	-0.201276	-0.247852	-0.027668	-0.112565	0.0574713
451Ra (OM687887) length (bp)	16114	11114	1388	2038	1569
ratioAT	0.643478	0.635865	0.648415	0.653582	0.680688
ratioGC	0.356522	0.364135	0.351585	0.346418	0.319312
ATskew	-0.0191918	-0.0672138	0.0355556	0.15015	0.0486891
GCskew	-0.191993	-0.251297	-0.0163934	-0.0679887	-0.0379242
451Rb (OM687888) length (bp)	16123	11114	1388	2038	1578
ratioAT	0.643677	0.635865	0.648415	0.653582	0.68251
ratioGC	0.356323	0.364135	0.351585	0.346418	0.31749
ATskew	-0.0192715	-0.0672138	0.0355556	0.15015	0.0473538
GCskew	-0.191993	-0.251297	-0.0163934	-0.0679887	-0.0379242
456Ra (OM687889) length (bp)	16119	11114	1388	2039	1573
ratioAT	0.643464	0.635775	0.648415	0.653752	0.680865
ratioGC	0.356536	0.364225	0.351585	0.346248	0.319135
ATskew	-0.0192827	-0.0676479	0.0355556	0.150788	0.0494865
GCskew	-0.191926	-0.250988	-0.0163934	-0.0708215	-0.0358566
456Rb (OM687890) length (bp)	16119	11114	1388	2039	1573
ratioAT	0.643526	0.635865	0.648415	0.653752	0.680865
ratioGC	0.356474	0.364135	0.351585	0.346248	0.319135
ATskew	-0.0193772	-0.0674968	0.0355556	0.150788	0.047619
GCskew	-0.192134	-0.251297	-0.0163934	-0.0708215	-0.0358566
374JYa (OL840312) length (bp)	15080	11134	1403	2037	487
ratioAT	0.725464	0.726693	0.704205	0.729013	0.735113
ratioGC	0.274536	0.273307	0.295795	0.270987	0.264887
ATskew	-0.0789762	-0.123965	0.0161943	0.0828283	0.0167598
GCskew	-0.0874396	-0.123891	0.0554217	0.00362319	-0.0387597
374JYb (OL840313) length (bp)	15061	11134	1403	2037	468
ratioAT	0.725251	0.726693	0.704205	0.729013	0.728632
ratioGC	0.274749	0.273307	0.295795	0.270987	0.271368
ATskew	-0.0793738	-0.123965	0.0161943	0.0828283	0.00879765
GCskew	-0.0869986	-0.123891	0.0554217	0.00362319	-0.023622
